# Supplementary material for: Predicting Risk Propensity Through Player Behavior in DOTA 2: A Cross-Sectional Study
Source: PubMed Central journal article supplement (PMC9099285; doi:10.3389/fpsyg.2022.827008), 2022-04-29
Supplement: Image_1.pdf [file Image_1.pdf]

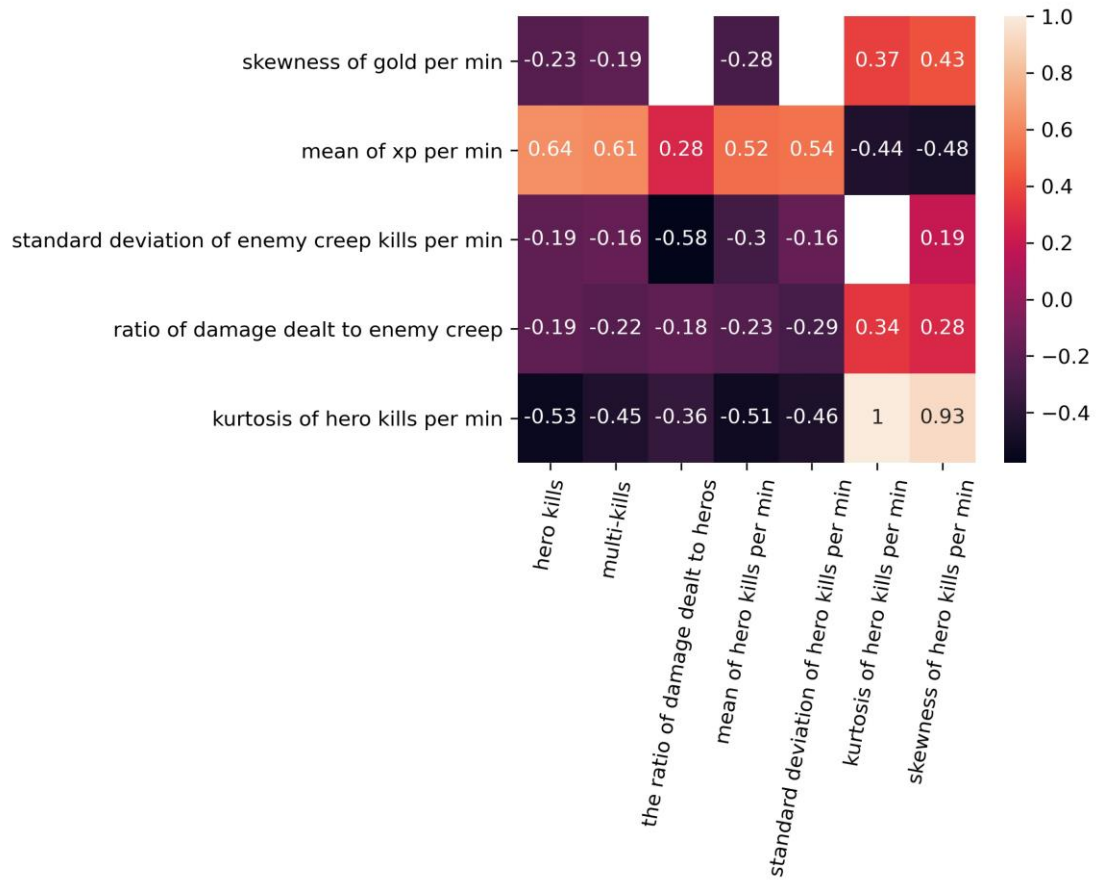

Supplementary Figure 1. Heatmap of the correlation coefficients between the features in the first category and hero killing behavior.
